# Supplementary material for: A High-Methionine Diet for One-Week Induces a High Accumulation of Methionine in the Cerebrospinal Fluid and Confers Bipolar Disorder-like Behavior in Mice
Source: MDPI journal article supplement (doi:10.3390/ijms23020928), 2022-01-15
Supplement: s1 [file s1]

Supplementary Table S1. Serum biochemical parameters in mice fed with 1×Met–13×Met diets for a week.

| Diet | AST (U/L)      | ALT (U/L)     | LDH (U/L)     | GLU (mg/dL)    | BUN (mg/dL)   | TG (mg/dL)    | MDA (μM)        |
|------|----------------|---------------|---------------|----------------|---------------|---------------|-----------------|
| 1×   | 71 ± 12 (4)    | 22 ± 8 (6)    | 248 ± 127 (4) | 285 ± 70 (4)   | 27 ± 5 (6)    | 103 ± 38 (3)  | 2.7 ± 0.6 (4)   |
| 1.2× | 91 ± 52 (4)    | 20 ± 6 (4)    | not tested    | 389 ± 84 (4)   | 34 ± 13 (4)   | not tested    | 3.5 ± 1.2 (4)   |
| 1.4× | 99 ± 9 (4) *   | 20 ± 2 (4)    | not tested    | 430 ± 34 (4) * | 24 ± 1 (4)    | not tested    | 2.5 ± 0.2 (4)   |
| 1.6× | 109 ± 46 (4)   | 22 ± 2 (4)    | not tested    | 312 ± 64 (4)   | 28 ± 2 (4)    | not tested    | 2.7 ± 0.2 (4)   |
| 1.8× | 99 ± 46 (4)    | 20 ± 5 (4)    | not tested    | 358 ± 37 (4)   | 30 ± 2 (4)    | not tested    | 2.7 ± 0.4 (4)   |
| 2×   | 119 ± 30 (4) * | 42 ± 17 (4)   | not tested    | 426 ± 65 (4) * | 30 ± 4 (4)    | not tested    | 2.7 ± 0.8 (4)   |
| 3×   | 128 ± 47 (4)   | 27 ± 7 (4)    | not tested    | 366 ± 43 (4)   | 30 ± 4 (4)    | not tested    | 2.3 ± 0.2 (4)   |
| 4×   | 121 ± 48 (4)   | 33 ± 12 (4)   | not tested    | 367 ± 59 (4)   | 29 ± 5 (4)    | not tested    | 2.9 ± 1.2 (4)   |
| 5×   | 104 ± 35 (3)   | 42 ± 22 (4)   | not tested    | 399 ± 70 (3)   | 28 ± 3 (3)    | not tested    | 2.2 ± 0.3 (4)   |
| 6×   | 116 ± 50 (4)   | 36 ± 19 (4)   | 298 ± 8 (4)   | 314 ± 47 (4)   | 25 ± 3 (4)    | not tested    | 2.9 ± 1.1 (4)   |
| 7×   | 71 ± 32 (3)    | 30 ± 6 (3)    | 321 ± 166 (4) | 309 ± 90 (4)   | 24 ± 4 (4)    | not tested    | 2.2 ± 0.3 (4)   |
| 8×   | 87 ± 19 (4)    | 36 ± 13 (4)   | 203 ± 27 (4)  | 271 ± 53 (4)   | 25 ± 3 (4)    | not tested    | 2.2 ± 0.3 (4)   |
| 9×   | 101 ± 38 (3)   | 148 ± 150 (4) | 362 ± 167 (4) | 255 ± 41 (4)   | 24 ± 4 (4)    | not tested    | 1.8 ± 0.5 (4)   |
| 10×  | 109 ± 37 (3)   | 255 ± 388 (4) | 406 ± 259 (4) | 214 ± 27 (4)   | 31 ± 5 (4)    | 118 ± 80 (4)  | 1.8 ± 0.2 (4) * |
| 11×  | 118 ± 35 (4)   | 82 ± 35 (4) * | 324 ± 45 (4)  | 227 ± 48 (4)   | 37 ± 5 (4) *  | 116 ± 78 (4)  | 1.8 ± 0.0 (4) * |
| 12×  | 250 ± 240 (3)  | 172 ± 114 (4) | 445 ± 114 (3) | 184 ± 32 (4)   | 36 ± 2 (3) ** | 140 ± 104 (4) | 2.0 ± 0.7 (3)   |
| 13×  | 99 ± 20 (3)    | 139 ± 189 (4) | 316 ± 62 (3)  | 154 ± 35 (4) * | 36 ± 7 (4)    | 37 ± 12 (4)   | 1.6 ± 0.1 (4) * |

Serum levels of aspartate aminotransferase (AST), alanine aminotransferase (ALT), lactate dehydrogenase (LDT), glucose (GLU), blood urea nitrogen (BUN), triglyceride (TG), and malondialdehyde (MDA) were measured. Data are mean ± SD (sample numbers). Differences *versus* the control (1×Met) samples are significant at \* $P < 0.05$  and \*\* $P < 0.01$  in the Student's *t*-test. Some samples were not tested for LDH and TG because no apparent alterations were observed in the diets with much higher Met doses.
